# Supplementary material for: Modern to millennium-old greenhouse gases emitted from freshwater ecosystems of the eastern Canadian Arctic
Source: Copernicus journal article supplement (doi:10.5194/bgd-12-11661-2015), 2015-07-24
Supplement: Supplementary file 1 [file Appendix B.docx]

|  | **Temperature (°C)** | | | **Precipitation (mm)** | | |
| --- | --- | --- | --- | --- | --- | --- |
| **Month** | **2013** | **2014** | **Normal** | **2013** | **2014** | **Normal** |
| Jan | -28,7 | -30,8 | -33,4 | 13,4 | 1,5 | 4,8 |
| Feb | -30,5 | -32,7 | -33,7 | 0,0 | 0,4 | 3,8 |
| Mar | -22,2 | -29,8 | -30,0 | 22,0 | 0,0 | 6,6 |
| Apr | -19,5 | -19,8 | -21,8 | 14,2 | 1,6 | 10,5 |
| May | -12,4 | -7,2 | -9,3 | 0,0 | 17,6 | 9,4 |
| Jun | 3,4 | 2,5 | 2,4 | 20,7 | 5,9 | 15,6 |
| **Total (Jan-Jun)** | **-18,3** | **-19,6** | **-21,0** | **70,3** | **27,0** | **50,7** |
