# Supplementary material for: Modern to millennium-old greenhouse gases emitted from freshwater ecosystems of the eastern Canadian Arctic
Source: Copernicus journal article supplement (doi:10.5194/bgd-12-11661-2015), 2015-07-24
Supplement: Supplementary file [file bgd-12-11661-2015-supplement-title-page.pdf › bgd-12-11661-2015-supplement-title-page.pdf]

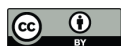

## *Supplement of*

# **Modern to millennium-old greenhouse gases emitted from freshwater ecosystems of the eastern Canadian Arctic**

**F. Bouchard et al.**

*Correspondence to:* F. Bouchard (frederic.bouchard@cen.ulaval.ca) and I. Laurion (isabelle.laurion@ete.inrs.ca)

- bgd-12-11661-2015-supplement-title-page.pdf
- Appendices (submitted)
  - Appendix A.JPG
  - Appendix B.docx
  - Appendix C.JPG
  - Appendix D.pdf
- \_\_MACOSX
  - Appendices (submitted)
    - \* .\_Appendix B.docx
    - \* .\_Appendix D.pdf

The copyright of individual parts of the supplement might differ from the CC-BY 3.0 licence.
