# Supplementary figures and images for: Modern to millennium-old greenhouse gases emitted from freshwater ecosystems of the eastern Canadian Arctic
Source: Copernicus journal article supplement (doi:10.5194/bgd-12-11661-2015), 2015-07-24

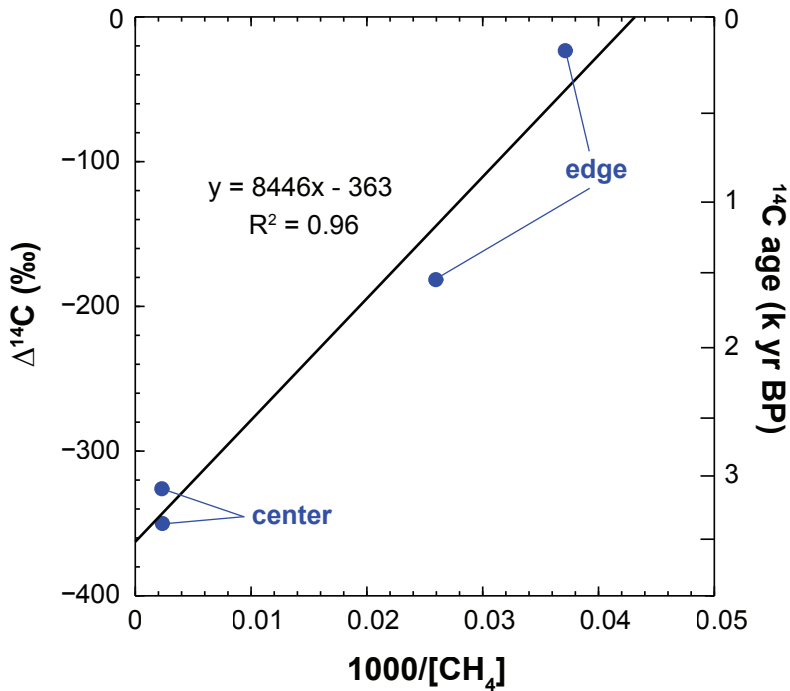

Supplement: Supplementary file 1 [file Appendix D.pdf › Appendices (submitted)/Appendix D.pdf]
